# Supplementary material for: Small noncoding RNA modulates japanese encephalitis virus replication and translation in trans
Source: Springer Nature journal article supplement (doi:10.1186/1743-422x-8-492), 2011-11-01
Supplement: 12985_2011_1607_MOESM2_ESM.pdf [file 12985_2011_1607_MOESM2_ESM.pdf]

A

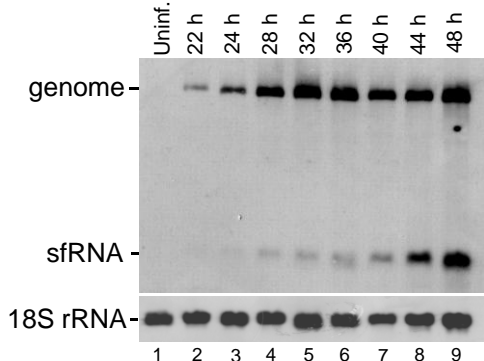

B

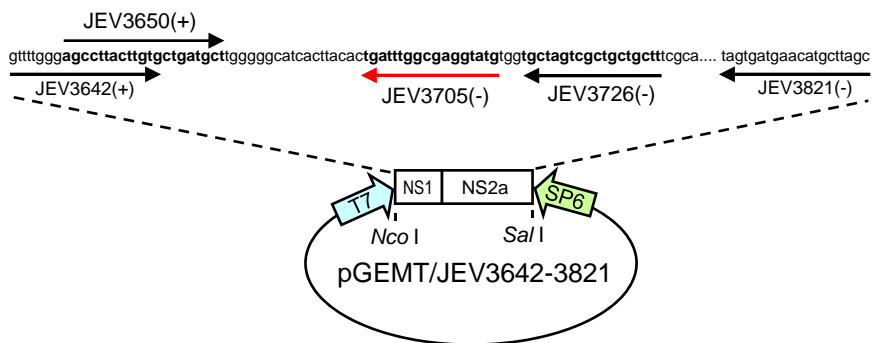

C

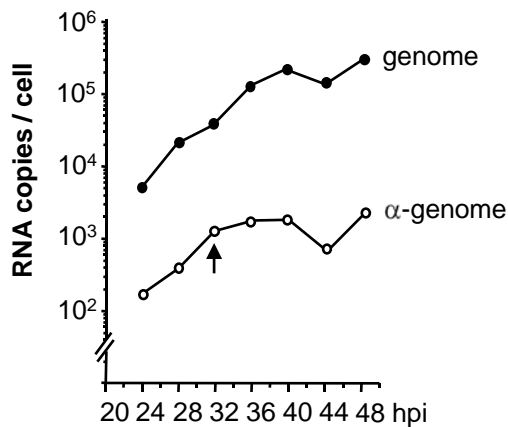

D

|                       | 24 hr              | 28 hr              | 32 hr              | 36 hr              | 40 hr              | 44 hr              | 48 hr              | 48 hr/24 hr    |
|-----------------------|--------------------|--------------------|--------------------|--------------------|--------------------|--------------------|--------------------|----------------|
| genome/cell           | $4.64 \times 10^3$ | $2.25 \times 10^4$ | $3.73 \times 10^4$ | $1.26 \times 10^5$ | $2.20 \times 10^5$ | $1.27 \times 10^5$ | $2.91 \times 10^5$ | $\uparrow 63X$ |
| $\alpha$ -genome/cell | $1.48 \times 10^2$ | $3.61 \times 10^2$ | $1.28 \times 10^3$ | $1.24 \times 10^3$ | $1.73 \times 10^3$ | $5.2 \times 10^2$  | $2.28 \times 10^3$ | $\uparrow 15X$ |
| (+)/(-) ratio         | 31                 | 62                 | 29                 | 102                | 127                | 244                | 128                |                |
