# Supplementary material for: Small noncoding RNA modulates japanese encephalitis virus replication and translation in trans
Source: Springer Nature journal article supplement (doi:10.1186/1743-422x-8-492), 2011-11-01

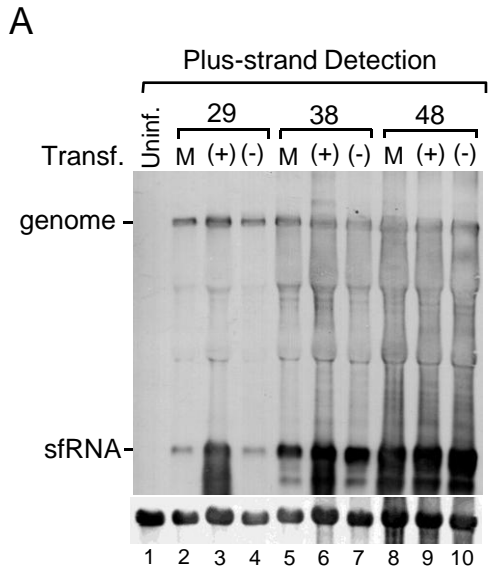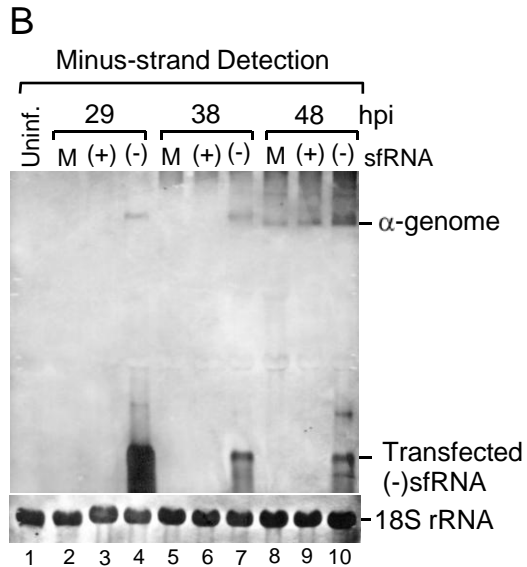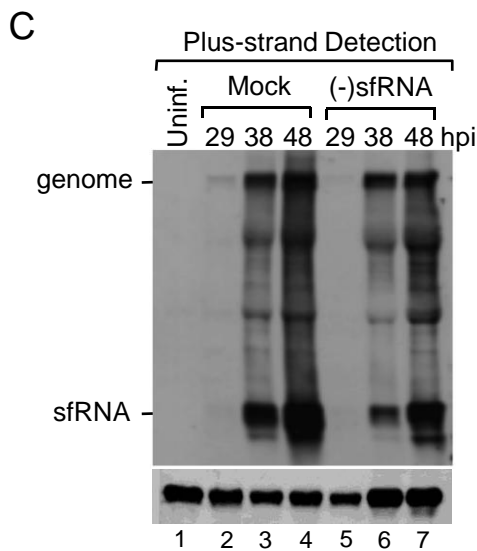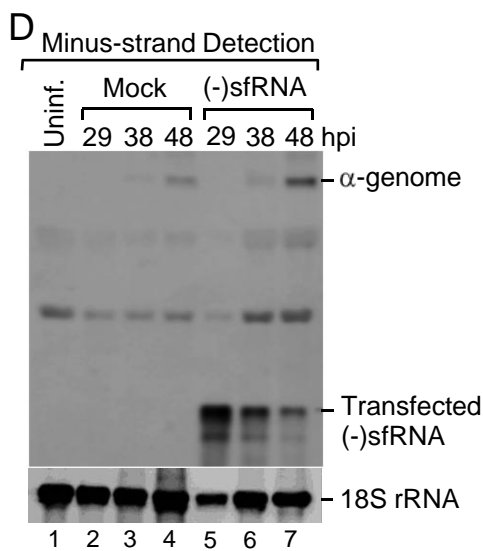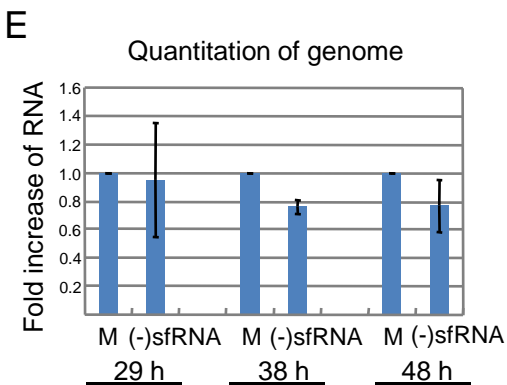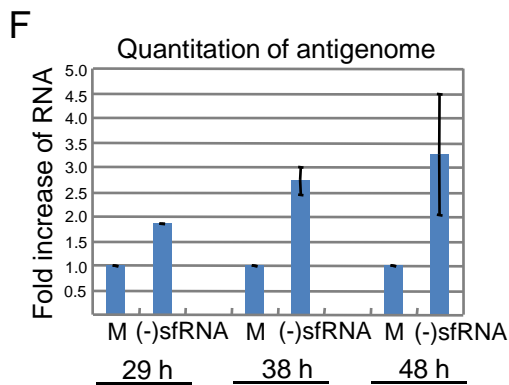

Supplement: 12985_2011_1607_MOESM3_ESM.pdf [file 12985_2011_1607_MOESM3_ESM.pdf]
