# Supplementary material for: Small noncoding RNA modulates japanese encephalitis virus replication and translation in trans
Source: Springer Nature journal article supplement (doi:10.1186/1743-422x-8-492), 2011-11-01
Supplement: 12985_2011_1607_MOESM4_ESM.pdf [file 12985_2011_1607_MOESM4_ESM.pdf]

A

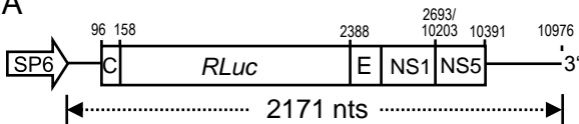

B

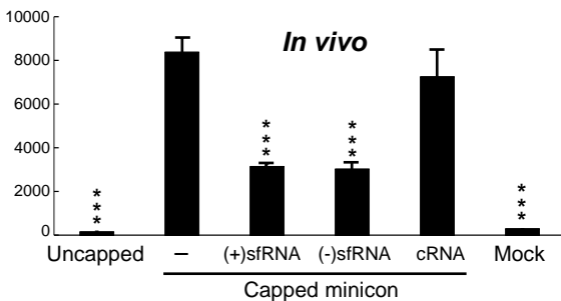

C

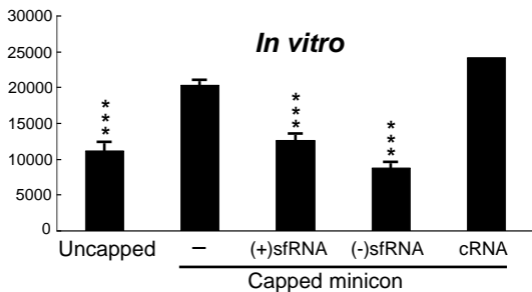

D

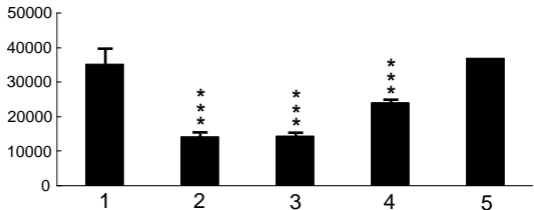

|                | 1     | 2     | 3     | 4     | 5     |
|----------------|-------|-------|-------|-------|-------|
| Capped minicon | 50 ng | 50 ng | 50 ng | 50 ng | 50 ng |
| (+)sfRNA       | -     | 50 ng | -     | 50 ng | 50 ng |
| (-)sfRNA       | -     | -     | 50 ng | 10 ng | 50 ng |
