# Supplementary material for: Small noncoding RNA modulates japanese encephalitis virus replication and translation in trans
Source: Springer Nature journal article supplement (doi:10.1186/1743-422x-8-492), 2011-11-01
Supplement: 12985_2011_1607_MOESM5_ESM.pdf [file 12985_2011_1607_MOESM5_ESM.pdf]

**A**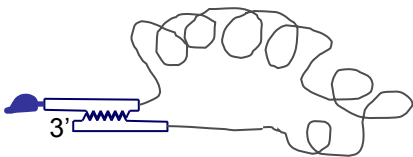

Genome cyclization aids in antigenome synthesis.

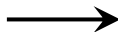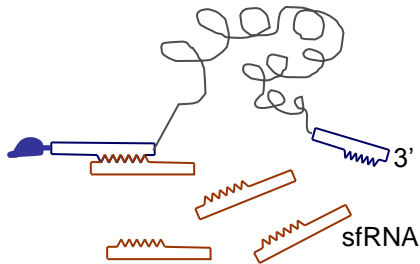

Genome cyclization disrupted and antigenome synthesis reduced.

**B**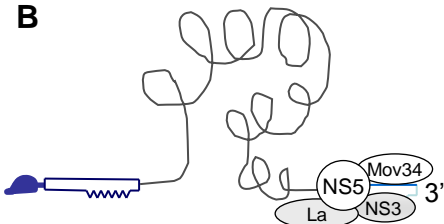

Proteins binding to 3'-UTR elements promotes translation/replication.

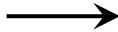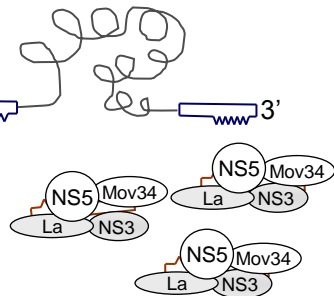

Proteins sequestered by sfRNA and reduced translation/replication.
